# Supplementary material
Source: Research Square preprint supplement (doi:10.21203/rs.3.rs-8670408/v1)
Supplement: Supplementary file 2 [file 8028b4bc8119f51543d29b4f.xlsx]

## Sheet: CoverSheet
Journal of Industrial Ecology – www.wileyonlinelibrary.com/journal/jie
SUPPORTING INFORMATION FOR:
Otterbach, N. & Fröhling, M. Assessing Raw Material Criticality from a Corporate Perspective - Method and Application to European Electrolyser Production. Journal of Industrial Ecology.
This supporting information provides the country shares of the three procurement scenarios. They are based on global production shares (USGS, 2025) and sourcing shares of the European Union (EU) (EC, 2023).

## Sheet: S1 | diversified, global
Stage	Material	Country	Share
Processing stage	Aluminum	Australia	0.1
Processing stage	Aluminum	Bahrain	0.1
Processing stage	Aluminum	Brazil	0.1
Processing stage	Aluminum	Canada	0.1
Processing stage	Aluminum	China	0.1
Processing stage	Aluminum	India	0.1
Processing stage	Aluminum	Malaysia	0.1
Processing stage	Aluminum	Norway	0.1
Processing stage	Aluminum	Russia	0.1
Processing stage	Aluminum	United Arab Emirates	0.1
Processing stage	Chromium	Finland	0.25
Processing stage	Chromium	India	0.25
Processing stage	Chromium	Kazakhstan	0.25
Processing stage	Chromium	Russia	0.25
Processing stage	Iron	Brazil	0.1
Processing stage	Iron	China	0.1
Processing stage	Iron	Germany	0.1
Processing stage	Iron	India	0.1
Processing stage	Iron	Japan	0.1
Processing stage	Iron	Korea, Republic of	0.1
Processing stage	Iron	Russia	0.1
Processing stage	Iron	Taiwan	0.1
Processing stage	Iron	United States	0.1
Processing stage	Iron	Vietnam	0.1
Processing stage	Nickel	Canada	0.25
Processing stage	Nickel	China	0.25
Processing stage	Nickel	Indonesia	0.25
Processing stage	Nickel	Japan	0.25
Processing stage	Niobium	Brazil	0.5
Processing stage	Niobium	Canada	0.5
Processing stage	Titanium metal	China	0.166667
Processing stage	Titanium metal	India	0.166667
Processing stage	Titanium metal	Japan	0.166667
Processing stage	Titanium metal	Kazakhstan	0.166667
Processing stage	Titanium metal	Russia	0.166667
Processing stage	Titanium metal	Saudi Arabia	0.166667
Processing stage	Zirconium	China	0.25
Processing stage	Zirconium	France	0.25
Processing stage	Zirconium	Russia	0.25
Processing stage	Zirconium	United States	0.25

## Sheet: S2 | diversified, EU
Stage	Material	Country	Share
Processing stage	Aluminium	Canada	0.1
Processing stage	Aluminium	France	0.1
Processing stage	Aluminium	Germany	0.1
Processing stage	Aluminium	Greece	0.1
Processing stage	Aluminium	Iceland	0.1
Processing stage	Aluminium	Mozambique	0.1
Processing stage	Aluminium	Romania	0.1
Processing stage	Aluminium	Russia	0.1
Processing stage	Aluminium	Slovakia	0.1
Processing stage	Aluminium	Spain	0.1
Processing stage	Chromium	Albania	0.1
Processing stage	Chromium	Finland	0.1
Processing stage	Chromium	Germany	0.1
Processing stage	Chromium	India	0.1
Processing stage	Chromium	Kazakhstan	0.1
Processing stage	Chromium	Russia	0.1
Processing stage	Chromium	South Africa	0.1
Processing stage	Chromium	Sweden	0.1
Processing stage	Chromium	Türkiye	0.1
Processing stage	Chromium	Zimbabwe	0.1
Processing stage	Iron	Austria	0.1
Processing stage	Iron	Belgium	0.1
Processing stage	Iron	Czechia	0.1
Processing stage	Iron	Finland	0.1
Processing stage	Iron	France	0.1
Processing stage	Iron	Germany	0.1
Processing stage	Iron	Italy	0.1
Processing stage	Iron	Netherlands	0.1
Processing stage	Iron	Poland	0.1
Processing stage	Iron	Spain	0.1
Processing stage	Nickel	Australia	0.1
Processing stage	Nickel	Brazil	0.1
Processing stage	Nickel	Canada	0.1
Processing stage	Nickel	Colombia	0.1
Processing stage	Nickel	Finland	0.1
Processing stage	Nickel	Greece	0.1
Processing stage	Nickel	Norway	0.1
Processing stage	Nickel	Russia	0.1
Processing stage	Nickel	South Africa	0.1
Processing stage	Nickel	United Kingdom	0.1
Processing stage	Niobium	Brasil	0.3333
Processing stage	Niobium	Canada	0.3333
Processing stage	Niobium	United Kingdom	0.3333
Processing stage	Titanium metal	Canada	0.1
Processing stage	Titanium metal	China	0.1
Processing stage	Titanium metal	Japan	0.1
Processing stage	Titanium metal	Kazakhstan	0.1
Processing stage	Titanium metal	Morocco	0.1
Processing stage	Titanium metal	Norway	0.1
Processing stage	Titanium metal	Russia	0.1
Processing stage	Titanium metal	Switzerland	0.1
Processing stage	Titanium metal	Türkiye	0.1
Processing stage	Titanium metal	Ukraine	0.1
Processing stage	Zirconium	France	0.25
Processing stage	Zirconium	United Kingdom	0.25
Processing stage	Zirconium	United States	0.25
Processing stage	Zirconium	Canada	0.25
	Zirconium	France	0.25
	Zirconium	United Kingdom	0.25
	Zirconium	United States	0.25
	Zirconium	Canada	0.25

## Sheet: S3 | local, EU
Stage	Material	Country	Share
Processing stage	Aluminium	France	0.1111
Processing stage	Aluminium	Germany	0.1111
Processing stage	Aluminium	Greece	0.1111
Processing stage	Aluminium	Norway	0.1111
Processing stage	Aluminium	Romania	0.1111
Processing stage	Aluminium	Slovakia	0.1111
Processing stage	Aluminium	Slovenia	0.1111
Processing stage	Aluminium	Spain	0.1111
Processing stage	Aluminium	Sweden	0.1111
Processing stage	Chromium	Finland	0.25
Processing stage	Chromium	Germany	0.25
Processing stage	Chromium	Russia	0.25
Processing stage	Chromium	Sweden	0.25
Processing stage	Iron	Austria	0.1
Processing stage	Iron	Belgium	0.1
Processing stage	Iron	Czechia	0.1
Processing stage	Iron	Finland	0.1
Processing stage	Iron	France	0.1
Processing stage	Iron	Germany	0.1
Processing stage	Iron	Italy	0.1
Processing stage	Iron	Netherlands	0.1
Processing stage	Iron	Poland	0.1
Processing stage	Iron	Spain	0.1
Processing stage	Nickel	Finland	0.25
Processing stage	Nickel	France	0.25
Processing stage	Nickel	Greece	0.25
Processing stage	Nickel	Norway	0.25
Processing stage	Niobium	United Kingdom	1
Processing stage	Titanium metal	Norway	1
Processing stage	Zirconium	France	1
	Titanium metal	Kazakhstan
	Titanium metal	Russia
	Titanium metal	China
	Titanium metal	Switzerland
	Titanium metal	Japan
	Titanium metal	Ukraine
	Titanium metal	Canada
	Titanium metal	Türkiye
	Titanium metal	Norway	1
	Titanium metal	Morocco
	Zirconium	France	1
	Zirconium	United Kingdom
	Zirconium	United States
	Zirconium	Canada

## Sheet: References
References
EC. (2023). Study on the critical raw materials for the EU 2023: Final report. European Commission. https://doi.org/10.2873/725585
USGS. (2025). Mineral commodity summaries 2025.
