# Supplementary material
Source: Research Square preprint supplement (doi:10.21203/rs.3.rs-8670408/v1)
Supplement: Supplementary file 3 [file 99858066fccdd4a34dee655b.xlsx]

## Sheet: CoverSheet
SUPPORTING INFORMATION FOR:
Otterbach, N. & Fröhling, M. Assessing Raw Material Criticality from a Corporate Perspective - Method and Application to European Electrolyser Production. Journal of Industrial Ecology.
This supporting information contains a detailed description of the TUM Method, based on the methodology profile developed by Otterbach & Fröhling (2025). Sheet 1 describes the risk assessment and mitigation based on the methodology profile. Sheets 2 to 5 supplement this description. Sheets 2 to 4 describe in detail the material level for the three dimensions of supply, environmental and social ri…

## Sheet: 1 | TUM Method
	Method denomination				TUM Method
	Distinctive features				Three-pronged process (vulnerability filter, raw material risk assessment, risk management); multi-level assessment (from material to company level); data readiness level													Assessment level
	Goal				Corporate-orientated raw material criticality assessment which enables companies to utilise prospective data requirements to effectively record and manage their raw material risks and mitigation measures													Technology	FALSE
	Scope																	Company	TRUE
		Industrial scope			Case study on green hydrogen (alkaline water electrolyser and proton exchange membrane electrolyser)													Product	TRUE
		Geographical scope			European Union													Material	TRUE
		Temporal scope			Short to long term
		Covered materials			Metals (case study: aluminium, gold, iridium, nickel, niobium, platinum, carbon steel, stainless steel, titanium and zirconium oxide)
	Dimension				Sub-dimension		Indicator				Evaluation							Data sources			Remarks
							Denomination and description	Corporate reference/ customisation	Time frame		Equation	Normalisation	Indicator range	Interpretation of value	Weighting			Exogenous	Endogenous
															Indicator	| Sub-dimension
	This part of the methodology is presented in separate sheets at material level (ML), divided according to the three dimensions and slightly adjusted to the specifics of the respective level. The sheet 'PC | indicators' depicts additional product and company level specific indicators.
	2 | ML | supply risks
	3 | ML | environmental risks
	4 | ML | social risks
	5 | PC | indicators
	Risk mitigation
	Measure						Linking to risk evaluation*		Remarks
	Long-term supply agreements						P		Use of fixed-price contracts to stabilise prices.
	Price hedging						P		Use of financial instruments such as futures and options to stabilise prices.
	Stock keeping						P, A		Increase in stock levels to compensate for temporary shortages or price peaks.
	Supplier diversification						P, A		Procurement of materials from multiple suppliers or regions to reduce dependency.
	Bargaining potential vis-à-vis suppliers						P		Using market position to avoid or reduce increases in raw material prices by upstream suppliers.
	Cost pass-through						P		Passing on increased raw material prices to customers.
	Material substitution						P, A, E, S		Replacing of critical materials with more abundant or sustainable alternatives.
	Shortening of supply chain						A		Shorter supply chains enable closer raw material supplier relationships, faster detection and correction of issues.
	Investment in mining						P, A		Acquiring a stake in a mine to improve access to the extracted raw materials.
	Improved supplier auditing and certification						E, S		Implementing sustainability and social audits to ensure responsible sourcing.
	Process optimisation/ material efficiency						P, A		Reduction of raw material input through improved production efficiency.
	Circular economy strategies						P, A, E, S		Circular economy strategies offer the potential to decouple economic activity from raw material consumption (e.g., Kjaer et al., 2018). Strategies aim to slow, narrow, and/ or close material loops, thereby minimising the use of virgin raw materials (Bocken et al., 2016). In the product design phase, the circular economy design diagram (Klose & Fröhling, 2025) can help companies select suitable st…
		-	Product design innovation (e.g., regarding material quality↑, quantity↓, diversity↓; life prolongation)
		-	Business model innovation (e.g., dematerialisation, product-service-systems)
		-	Engagement in take-back systems
		-	Investment in recycling technologies
		-	Recycling raw material partnerships
		-	…
	Dematerialisation						P, A, E, S		Reducing raw material demand by focusing on benefits, e.g. through new business models.
	Research and development for material innovations						P, A, E, S		Research to develop new materials, products or production technologies.
	Vertical collaboration and integration						P, A, E, S		Vertical collaboration and integration improve transparency, access to raw materials in the upstream supply chain, smoother demand planning, as well as facilitating the circular economy.
	-	backward
	-	forward
	*	The material level indicators and risk mitigation measures are linked by classification according to the identified and mitigated risks, respectively.
		P = price risks
		A = availability risks
		E = risks related to environmental impacts
		S = risks related to social impacts
	Visualisation
	Chart type				Sunburst and tabular presentation with colour scale formatting
	Specifics				Sunburst can depict several information level
	Business integration
	cf. Figure 1 and section 2.10 of the main study

## Sheet: 2 | ML | supply risks
Dimension		Sub-dimension		Indicator							Evaluation							Data sources			Remarks
				Denomination	Indicator abbreviation	Rationale	Time frame	Assessment stage	Data readiness levels*		Equation	Normalisation	Indicator range	Interpretation of value	Weighting			Exogenous	Endogenous
															Indicator	Sub-dimension
Supply risks		Changes in supply and demand		Companionality	C	Proportion of raw material that is extracted as a by-product. A raw material is mined as a by-product if mining it alone is not economically viable (Graedel et al., 2012). Their availability depends on the demand for the host material (Spörri et al., 2017).	Long term	Extraction	Level 1		i: material	-	[0;100]	100 = most critical	0.2	0.333333		Percentage of global production obtained as companion from Nassar et al. (2015).	-
				Demand growth	DG	Expected growth in demand of raw materials due to future technologies in comparison to current global production (Hillenbrand et al., 2024; Kolotzek, 2018) or global economic growth (Duclos et al., 2010; VDI, 2018).	Medium term	Extraction	Generic level: demand growth in general Corporate level: corporate demand growth (4 readiness levels not applicable)		y: demand growth FTD: future technology demand Production: global production i: material f: year in future p: reference year in past		[0;100]	100 = most critical	0.2			Production and demand of the base year (2018) and future demand (SSP2, 2040) from Marscheider-Weidemann et al. (2021).	Corporate demand		Normalisation based on Kolotzek (2018).
				Recycling rate	RR	Share of recycled material content to identify the dependence on primary raw materials (Bach et al., 2016; Kolotzek, 2018). The higher the share of secondary materials, the less primary materials need to be extracted and produced (Bach et al., 2017).	Medium term	Recycling	Level 1: generic EoLRIR Level 2: EU EoLRIR Level 3: corporate-specific EoLRIR		The End of Life Recycling Input Rate (EoL-RIR) measures the percentage of total demand that can be met by secondary raw materials (EC, 2023).		[0;100]	100 = most critical	0.2			EoL-RIR from UNEP (2011) for level 1 and Eurostat (2023) for level 2.	Corporate EoLRIR
				Static reach reserves	SRR	It measures the risk of decreasing supply in the future as depletion time of primary raw materials (André & Ljunggren, 2022; Bach et al., 2016).	Long term	Extraction	Level 1		y: static reach (in years) i: material	if yi ≤ 100 if yi > 100, then SR = 0 The normalisation factors 1/5 and 8/1000 ensure that a static reach of 0 years result in a risk score of 100, whereas a50 years result in a score of 70 and 100 years yield a default value of 0 (Graedel et al., 2012).	[0;100]	100 = most critical	0.2			Reserve shares and global annual production from USGS (2025).	-		Normalisation based on Graedel et al. (2012).
				Substitutability	S	It measures the possibility of replacing one material with another in a specific application without significantly impairing the performance, functionality or cost-effectiveness of the product (Graedel et al., 2012; Habib & Wenzel, 2016).	Medium term	-	Generic level: general substitutability Corporate level: corporate utilisation shares and corporate-specific substitute performance (product/corporate level: 'ability to substitute'; 4 readiness levels not applicable)		U: utilisation share of raw material i by a technology or product (application) in the total global use SP: substitute performance i: material k: applications	-	[0;100]	100 = most critical	0.2			Substitute performance taken from Graedel et al. (2012, 2015).	-
		Concentration risks		Production concentration at company level	PCM	High market concentration harbours the risk that a country or company could strategically exploit its monopoly position in times of global conflict or upheaval (Hillenbrand et al., 2024; VDI, 2018).	Medium term	Applicable to extraction, processing and recycling stage.	Level 1 as generic market risk indicator. In addition: level 2 or level 3 (variable S).		HHI: supply concentration of material (three main producers at company level) S: annual production shares of largest companies in extraction or processing i: raw material j: countries	if HHI ≥ 33 if HHI < 33, then PCC = 0 The HHI values range from 0 to 10,000, the normalisation factors 17.5 and 61.18 are defined in such a way that an HHI value of 1800 corresponds to a supply risk of 70 and the maximum criticality to 100 (Graedel et al., 2012).	[0;100]	100 = most critical	0.333333	0.333333		Internet research, company shares mainly taken from 'Technik und Einkauf'	Shares of tier-n suppliers		Normalisation based on Graedel et al. (2012). Could be applied to assess secondary materials if their countries of origin are known.
				Production concentration at country level	PCU		Medium term	Applicable to extraction, processing and recycling stage.	Level 1 as generic market risk indicator. In addition: level 2 or level 3 (variable S).		HHI: supply concentration of material (three main producers at country level) S: annual production shares of countries i: raw material j: countries	if HHI ≥ 33 if HHI < 33, then PC = 0	[0;100]	100 = most critical	0.333333			Global perspective: Mine and refinery production from USGS (2025); supplementary: extraction and processing stage from EC (2023, Annex 7) EU perspective: extraction and processing shares from EC (2023, Annex 8)	Shares of countries of origin		Normalisation based on Graedel et al. (2012). Could be applied to assess secondary materials if their countries of origin are known.
				Reserve concentration	RC		Long term	-	Level 1		HHI: supply concentration of material (of three main deposits, at reserve level) S: estimated reserve shares i: raw material j: countries	if HHI ≥ 33 if HHI < 33, then RC = 0	[0;100]	100 = most critical	0.333333			Reserve shares from USGS (2025)	-		Normalisation based on Graedel et al. (2012).
		Political risks		Political perception	PP	Political framework conditions of the producing countries with regard to enabling or restricting mining projects (Graedel et al., 2012).	Medium term	Extraction	Level 1 as generic market risk indicator. In addition: level 2 or level 3 (variable P).		y: policy perception in producing countries PPI: policy perception index of country j P: extraction share of country j for material i i: material j: countries	The PPI ranges from 0 to 100, with 100 representing the most attractive jurisdictions for mining investment. To remain consistent, the scale needs to be inverted - 100 should indicate the least attractive jurisdictions, i.e. the highest criticality.	[0;100]	100 = most critical	0.333333	0.333333		PPI (Mejía & Aliakbari, 2023) EU perspective: extraction from EC (2023, Annex 8)	Shares of countries of origin
				Political stability	PS	Likelihood of a producing country maintaining a stable political environment, free from disruptions like governmental shifts, civil unrest or terrorism (Goddin, 2019).	Medium term	Applicable to extraction, processing and recycling stage.	Level 1 as generic market risk indicator. In addition: level 2 or level 3 (variable P).		y: political stability of producing countries WGI-PV: worldwide governance indicator for Political Stability and Absence of Violence/ Terrorism (measured in percentile rank) of country j P: production share of country j for material i i: material j: countries	As percentile rank, the WGI ranges from 0 to 100, with 100 indicating the best governance. To remain consistent, the scale needs to be inverted - 100 should indicate the worst governance, i.e., the highest criticality.	[0;100]	100 = most critical	0.333333			WGI for Political Stability and Absence of Violence/ Terrorism (Persentile Rank) (World Bank, 2025) Production share: extraction and processing share of EC (2023); more general: USGS (2025), cf. Production concentration indicator	Shares of countries of origin		Could be applied to assess secondary materials if their countries of origin are known.
				Trade restrictions	TR	Risk of supply disruption due government-imposed measures such as tariffs and quotas to control the cross-border flow of materials and goods.	Medium term	Applicable to extraction, processing and recycling stage.	Level 2 or level 3 (variable P). Level 1 is not applicable as ordinal scale depends on country perspective.		TR: trade restriction with producing countries ERA: export restriction assessment level of country j P: production share of country j for material i i: material j: countries ERA level (for material i from country j) 100 | Incisive trade restriction measures of the production country j for material i 67 | No trade agreement and no incisive trade restriction measures of the production country j 33 …	-	[0;100]	100 = most critical	0.333333			Inventory of Export Restrictions on Industrial Raw Materials (OECD, 2023) Production share: extraction and processing share of EC (2023); more general: USGS (2025), cf. Production concentration indicator	Shares of countries of origin		Could be applied to assess secondary materials if their countries of origin are known.
*As described in the main study: In contrast to the dimensions of environmental and social risks, the calculation of indicators for supply risks varies considerably. Some indicators, such as the ‘reserve concentration’, assess the global situation and cannot be customised. Other indicators measure risks at country level, such as ‘political stability’. In this case, levels 1 to 3 are applicable. H…

## Sheet: 3 | ML | environmental risks
Dimension		Sub-dimension		Indicator							Evaluation									Data sources			Remarks
				Denomination	Indicator abbreviation	Rationale	Time frame	Assessment stage	Data readiness levels		Indicator raw value	Unit	Equation	Normalisation	Indicator range	Interpretation of value	Weighting			Exogenous	Endogenous
																	Indicator	Sub-dimension
Environmental impacts		Ecosystem quality		Acidification: terrestrial	AT	cf. ReCiPe	Hierarchist archetype (medium term)	Applicable to extraction, processing and recycling stage.	Level 1 - 4		Endpoint (H) of respective indicator for 1kg of raw material	Species.yr*	eij = Endpoint/ ReCiPe normalisation score	d = dataset/ source i = raw material j = impact indicator sid = share of LCIA dataset d for raw material i eij = endpoint of impact indicator j for raw material i. Endpoints retrieved from dataset d and world normalisation of ReCiPe applied.	[0;100]	100 = most critical	1/12	1/2		Ecoinvent v3.11, ReCiPe 2016 v1.03, cut-off (Ecoinvent, 2025)	-
				Climate change: freshwater ecosystems	CCF												"
				Climate change: terrestrial ecosystems	CCT												"
				Ecotoxicity: freshwater	EF												"
				Ecotoxicity: marine	EM												"
				Ecotoxicity: terrestrial	ET												"
				Eutrophication: freshwater	EPF												"
				Eutrophication: marine	EPM												"
				Land use	LU												"
				Photochemical oxidant formation: terrestrial ecosystems	PFT												"
				Water use: aquatic ecosystems	WUA												"
				Water use: terrestrial ecosystems	WUT												"
		Human health		Climate change: human health	CCH	cf. ReCiPe	Hierarchist archetype (medium term)	Applicable to extraction, processing and recycling stage.	Level 1 - 4		Endpoint (H) of respective indicator for 1kg of raw material	DALYs**	eij = Endpoint/ ReCiPe normalisation score		[0;100]	100 = most critical	1/8	1/2		Ecoinvent v3.11, ReCiPe 2016 v1.03, cut-off (Ecoinvent, 2025)	-
				Human toxicity: carcinogenic	HTC												"
				Human toxicity: non-carcinogenic	HTN												"
				Ionising radiation	IoR												"
				Ozone depletion	OD												"
				Particulate matter formation	PMF												"
				Photochemical oxidant formation: human health	PFH												"
				Water use: human health	WUH												"
*Species.yr = local species loss integrated over time (species year)
**DALYs (disability adjusted life years) = represent the years that are lost or that a person is disabled due to a disease or accident

## Sheet: 4 | ML | social risks
Dimension		Sub-dimension		Indicator							Evaluation							Data sources			Remarks
				Denomination	Indicator abbreviation	Rationale	Time frame	Assessment stage	Data readiness levels		Equation	Normalisation	Indicator range	Interpretation of value	Weighting			Exogenous	Endogenous
															Indicator	Sub-dimension
Social risks		Labour conditions		Children in employment	CE	cf. PSILCA (Loubert et al., 2023)	Short to medium term	Applicable to extraction, processing and recycling stage.	Level 1 - 4		Criticality indicator: respective social risk indicator SR: social risk level of (relevant sector in) country j P: production share of country j for material i i: material j: countries SR level (of (relevant sector in) country j) 100 | Very high risk 80 | High risk 60 | Medium risk 40 | Low risk 20 | Very low risk 0 | No risk	-	[0;100]	100 = most critical	1/8	1/2		SR levels (PSILCA, 2025), global country production shares (USGS, 2025) for level 1 and production shares from EU perspective for level 2 (EC, 2023)	Shares of countries of origin (level 3), for sector-specific indicators shares of tier-n suppliers and their corporate risk values (level 4)		Sector-specific indicator
				Frequency of forced labour	FFL				Level 1 - 3						"
				Rate of fatal accidents at workplace	FAW				Level 1 - 4						"						Sector-specific indicator
				Rate of non-fatal accidents at workplace	NFAW				Level 1 - 4						"						Sector-specific indicator
				Right of collective bargaining	CB				Level 1 - 4						"						Sector-specific indicator
				Right to strike	RS				Level 1 - 4						"						Sector-specific indicator
				Sector average wage	SW				Level 1 - 4						"						Sector-specific indicator
				Trafficking in persons	TP				Level 1 - 3						"
		National conditions		Drinking water coverage	DW	cf. PSILCA (Loubert et al., 2023)	Short to medium term	Applicable to extraction, processing and recycling stage.	Level 1 - 3			-	[0;100]	100 = most critical	1/7	1/2		SR levels (PSILCA, 2025), global country production shares (USGS, 2025) for level 1 and production shares from EU perspective for level 2 (EC, 2023)	Shares of countries of origin (level 3)
				Emigration rate	ER				Level 1 - 3						"
				Illiteracy rate	IR				Level 1 - 3						"
				International migrant stock	IMS				Level 1 - 3						"
				Life expectancy at birth	LEB				Level 1 - 3						"
				Public sector corruption	PSC				Level 1 - 3						"
				Unemployment rate in the country	UR				Level 1 - 3						"

## Sheet: 5 | PC | indicators
	Level	Indicator					Evaluation					Data sources			Remarks
		Denomination	Indicator abbreviation	Rationale	Time frame		Equation	Normalisation	Indicator range	Interpretation of value		Exogenous	Endogenous
	Company level	Importance to corporate strategy	IB	Importance of the material or product for the business strategy, taking all corporate applications/ product types into consideration.	Medium term		ICS: importance to corporate strategy S: share of corporate application i: material k: corporate application Ordinal scale for IBi,k 100 | Essential for corporate strategy 67 | Important 33 | Moderately important 0 | Less important	-	[0;100]	100 = most critical			Corporate expert judgement of the product/application's importance for corporate strategy.		Thresholds based on Graedel et al. (2012).
	Company level	Material demand	MD	The indicator relates the company’s consumption of one raw material to its total consumption (VDI, 2018).	Short term		Ordinal scale 100 | The demand of material i accounts for at least 20wt% of the total material demand of the company 67 | The demand accounts for 10 to 19wt% 33 | The demand accounts for 2.5 to 9wt% 0 | The demand accounts for less than 2.5wt%	-	[0;100]	100 = most critical			Corporate material demand
	Company level/ product level	Ability to innovate	AI	It covers a company's medium to long-term end-use specific ability to mitigate risks through innovation.	Medium to long term		Ordinal scale 100 | None (﻿no inventions or patents; no R&D budget to speak of; no employee empowerment) 67 | Minor (﻿hardly any own inventions; few patent applications; small R&D budget; little employee empowerment) 33 | Good (﻿high inventiveness and/or large number of invention disclosures; sufficient R&D budget to implement ideas; motivation and empowerment of employees) 0 | Very good (﻿contin…	-	[0;100]	100 = most critical			R&D budget, number of new inventions, products and patents; estimation of corporate culture, e.g. based on annual employee survey		Ordinal scale based on VDI (2018). Differences between product ares can be considered through weighting of the product area specific risk values.
	Company level/ product level	Ability to substitute	AS	It measures the possibility of replacing one material with another in a specific application without significantly impairing the performance, functionality or cost-effectiveness of the product (Graedel et al., 2012; Habib & Wenzel, 2016).	Medium term		CU: corporate utilisation share of a raw material i by a technology or product (application) CSP: corporate-specific substitute performance SA: substitute availabilty EIR: environmental impact ratio SIR: social impact ratio PR: price ratio i: material s: main substitute of material i k: applications	-	[0;100]	100 = most critical			Main substitute determined for the respective material and product (end-use) is determined by corporate expert judgement.		Calculation of SA, EIR, PR is shown in the supplementary material of Graedel et al. (2012, p.S42ff.). The SIR is calculated in analogy to the calculation of the EIR.
	Company level/ product level	Impact on revenue	IRE	Percentage of revenue that is impacted if the product cannot be produced.	Short term		Ordinal scale 100 | Product impacts at least 5% of the corporate annual revenue 67 | Impacted revenue between 2.5 and 5% 33 | Impacted revenue between 0.5 and 2.5% 0 | Impacted revenue below 0.5%	-	[0;100]	100 = most critical			Total annual revenue and revenue impacted by corporate product areas.		Thresholds based on Graedel et al. (2012). Company level if all product areas of the company are considered, then the product risks are weighted according to the product's share.
	Company level/ product level	Cost pass-through	CP	It comprises the bargaining power vis-à-vis the company's customers. Mainly price risks can be alleviated, not supply interruptions.	Short term		Ordinal scale 100 | None (﻿In the past it was virtually impossible to pass raw material price increases through to customers to any appreciable extent.) 67 | Minor (﻿In the past raw material price increases could be passed through to customers rarely and/or only to a small extent (< 2/3 of the price increase) 33 | Largely (﻿In the past raw material prices increases could be passed through to cust…	-	[0;100]	100 = most critical			Cost pass-through		Company level if all product areas of the company are considered, then the product risks are weighted according to the product's share. Ordinal scale based on VDI (2018).
	Product level	Impact on product	IP	This indicator relates the product's requirement for a raw material to the total material requirement of this product - both in terms of mass and in terms of monetary value.	Short term		Ordinal scale 100 | Material i accounts for at least 20% (either in w/w or €) of the total material demand of the considered product 67 | The demand accounts for 10 to 19% 33 | The demand accounts for 2.5 to 9% 0 | The demand accounts for less than 2.5%	-	[0;100]	100 = most critical			Bill of materials of product.

## Sheet: References
References
André, H., & Ljunggren, M. (2022). Short and long-term mineral resource scarcity impacts for a car manufacturer: The case of electric traction motors. Journal of Cleaner Production, 361, 132140. https://doi.org/10.1016/j.jclepro.2022.132140
Bach, V., Berger, M., Finogenova, N., & Finkbeiner, M. (2017). Assessing the Availability of Terrestrial Biotic Materials in Product Systems (BIRD). Sustainability, 9(1), 137. https://doi.org/10.3390/su9010137
Bach, V., Berger, M., Henßler, M., Kirchner, M., Leiser, S., Mohr, L., Rother, E., Ruhland, K., Schneider, L., Tikana, L., Volkhausen, W., Walachowicz, F., & Finkbeiner, M. (2016). Integrated method to assess resource efficiency – ESSENZ. Journal of Cleaner Production, 137, 118–130. https://doi.org/10.1016/j.jclepro.2016.07.077
Duclos, S. J., Otto, J. P., & Konitzer, D. G. (2010). Design in an era of constrained resources. Mechanical Engineering, Article 36-40.
EC. (2023). Study on the critical raw materials for the EU 2023: Final report. European Commission. https://doi.org/10.2873/725585
Ecoinvent. (2025). Ecoinvent | database. https://ecoinvent.org/
Eurostat. (2023). Contribution of recycled materials to raw materials demand - end-of-life recycling input rates (EOL-RIR). https://doi.org/10.2908/CEI_SRM010
Goddin, J. R. J. (2019). Identifying Supply Chain Risks for Critical and Strategic Materials. World Scientific Publishing Company.
Graedel, T. E., Barr, R., Chandler, C., Chase, T., Choi, J., Christoffersen, L., Friedlander, E., Henly, C., Jun, C., Nassar, N. T., Schechner, D., Warren, S., Yang, M.‑Y., & Zhu, C. (2012). Methodology of metal criticality determination. Environmental Science & Technology, 46(2), 1063–1070. https://doi.org/10.1021/es203534z
Graedel, T. E., Harper, E. M., Nassar, N. T., & Reck, B. K. (2015). On the materials basis of modern society. Proceedings of the National Academy of Sciences of the United States of America, 112(20), 6295–6300. https://doi.org/10.1073/pnas.1312752110
Habib, K., & Wenzel, H. (2016). Reviewing resource criticality assessment from a dynamic and technology specific perspective – using the case of direct-drive wind turbines. Journal of Cleaner Production, 112, 3852–3863. https://doi.org/10.1016/j.jclepro.2015.07.064
Hillenbrand, M., Helbig, C., & Marschall, R. (2024). Supply risk considerations for photoelectrochemical water splitting materials. Energy & Environmental Science, 17(7), 2369–2380. https://doi.org/10.1039/D3EE04369J
Kolotzek, C. (2018). Entwicklung einer nachhaltigkeitsorientierten Rohstoffbewertung zur Unterstützung von Entscheidungsprozessen in Unternehmen. Springer Fachmedien Wiesbaden. https://doi.org/10.1007/978-3-658-22392-2
Marscheider-Weidemann, F., Langkau, S., Eberling, E., Erdmann, L., Haendel, M., Loibl, A., Neef, C., Neuwirth, M., Rostek, L., Shirinzadeh, S., Stijepic, D., & Tercero Espinoza, L. (2021). Rohstoffe für Zukunftstechnologien 2021 – DERA Rohstoffinformationen.
Mejía, J., & Aliakbari, E. (2023). Fraser institute annual survey of mining companies 2022. Fraser Institute Annual. http://www.fraserinstitute.org
Nassar, N. T., Graedel, T. E., & Harper, E. M. (2015). By-product metals are technologically essential but have problematic supply. Science Advances, 1(3), e1400180. https://doi.org/10.1126/sciadv.1400180
Otterbach, N., & Fröhling, M. (2025). Raw material criticality assessments as decision-making support for corporate circular economy strategies – A systematic review. Resources, Conservation and Recycling, 219, 108299. https://doi.org/10.1016/j.resconrec.2025.108299
PSILCA. (2025). Product Social Impact Life Cycle Assessment | database. https://psilca.net/
Spörri, A., Kissling-Näf, I., Seyler, C., Bernath, K., Wäger, P., & Du, X. (2017). RESourcenCHECK für KMUs.
UNEP. (2011). Recycling rates of metals: A status report.
USGS. (2025). Mineral commodity summaries 2025.
VDI. (2018). VDI Standard 4800 Part 2: Resource Efficiency - Evaluation of Raw Material Demand. https://www.vdi.de/richtlinien/details/vdi-4800-blatt-2-ressourceneffizienz-bewertung-des-rohstoffaufwands
World Bank. (2025). Worldwide Governance Indicators | database. https://www.worldbank.org/en/publication/worldwide-governance-indicators
