# Supplementary material
Source: Research Square preprint supplement (doi:10.21203/rs.3.rs-8670408/v1)
Supplement: Supplementary file 4 [file d19ff36d2968b69c8f4191e4.xlsx]

## Sheet: CoverSheet
Journal of Industrial Ecology – www.wileyonlinelibrary.com/journal/jie
SUPPORTING INFORMATION FOR:
Otterbach, N. & Fröhling, M. Assessing Raw Material Criticality from a Corporate Perspective - Method and Application to European Electrolyser Production. Journal of Industrial Ecology.
This supporting information provides all risk assessment results of the case study at material level (ML), including the scenario analysis (SA) results. Blank cells indicate missing values due to data gaps that could not be closed. Grey cells show if the indicator is not applicable for the respective level or assessment type.

## Sheet: Tab. 4 extended
	Long version of table 4 of main study. Raw material risk assessment results on material level, level 1 (global perspective), maximum risk value of extraction, processing and secondary raw material stage. Missing values due to data gaps are indicated through blank spaces.
			Al	Cr	Au	Fe	Ni	Nb	Pt	Steel	Ti	Zr
	Changes in supply and demand		41	63.75	55	38	53	26.6667	37.4		36.4	83.5
		CompanionalityA	0	2	14	1	2	2	16	-	0	100
		Demand growthP,A							37		7
		Recycling rateP,A	65	81	70	60	65	78	67		48	95
		Static reach reservesA	52	89	93	34	83	0	0	-	60	71
		SubstitutabilityP,A	47	83	43	57	62		67		67	68
	Concentration risks		58.6667	54.3333	46.3333	72	67.3333	96.3333	90	74.5	76	83.3333
		Production concentration at company levelP,A	32	8	5	64	48	94		70	73	79
		Production concentration at country levelP,A	82	76	76	86	80	97	88	79	88	79
		Reserves concentrationA	62	79	58	66	74	98	92	-	67	92
	Political risks		49.5	62	40	52	54	53	63	62	63.5	50
		Political perceptionP,A	36	53	32	37	50	37	50		60	41
		Political stabilityP,A,S	63	71	48	67	58	69	76	62	67	59
	Supply risks		49.7222	60.0278	47.1111	54	58.1111	58.6667	63.4667	68.25	58.6333	72.2778
	Ecosystem quality		0.541471	0.165155	24.4551	0.0163715	0.270337		22.5399	0.0105868	0.324168	0.239499
		Acidification: terrestrialE	0.0313583	0.0209161	19.2059	0.0010363	0.0341088		28.8737	0.000939267	0.043999	0.032235
		Climate change: freshwater ecosystemsP,E	0.0237032	0.0315246	20.1873	0.00200203	0.0219353		18.2523	0.00201	0.0510506	0.0367026
		Climate change: terrestrial ecosystemsP,E	0.0237095	0.0315334	20.1893	0.00200258	0.0219422		18.2551	0.00201052	0.0510635	0.0367125
		Ecotoxicity: freshwaterE	3.58761	0.950478	71.2261	0.0981629	1.55823		61.0543	0.0616787	1.83295	1.36689
		Ecotoxicity: marineE	2.64432	0.793865	68.5806	0.0842847	1.25492		58.4504	0.0505439	1.52266	1.12996
		Ecotoxicity: terrestrialE	1.96682e-06	1.10773e-05	0.0113163	1.08247e-06	0.00011564		0.00892556	2.77025e-07	8.07694e-06	5.99845e-06
		Eutrophication: freshwaterE	0.152728	0.116687	47.5807	0.0067422	0.106232		39.6623	0.00783687	0.312063	0.212489
		Eutrophication: marineE	0.00217499	0.00185224	6.45227	0.000121412	0.0131613		4.89877	0.000115433	0.00396361	0.00286098
		Land useE	2.54198e-05	4.80835e-05	0.501163	3.57683e-06	9.23893e-05		0.191398	3.40793e-06	0.000198101	0.000242359
		Photochemical oxidant formation: ter. ecosystemsE	0.0320233	0.0349461	24.7559	0.00210132	0.0280932		33.3814	0.00190342	0.0633816	0.0477407
		Water use: aquatic ecosystemsE	0	0	4.12974	0	0.0416927		1.80907	0	0	0
		Water use: terrestrial ecosystemsE	0	0	10.6405	0	0.163515		5.64127	0	0.00867917	0.00815641
	Human health		0.977957	3.01948	29.2791	1.11887	0.720966		29.0499	0.31327	2.32149	2.02339
		Climate change: human healthP,E	0.0237056	0.031528	20.1882	0	0.0219377		18.2539	0	0.0510557	0.0367065
		Human toxicity: carcinogenicE,S	7.44275	23.749	61.6771	8.92562	3.80679		64.5831	2.48539	17.7414	15.4302
		Human toxicity: non-carcinogenicE,S	0.289728	0.284503	63.5547	0.0253703	1.31156		62.3083	0.020771	0.608388	0.462609
		Ionising radiationE	0.0183237	0.0263951	25.3594	0	0.115828		13.3643	0	0.0583331	0.168822
		Ozone depletionE	0	0	3.86549	0	0		8.43745	0	0	0
		Particulate matter formationE,S	0.0213475	0.020357	17.971	0	0.0188772		22.0955	0	0.0332649	0.0242345
		Photochemical oxidant formation: human healthE,S	0.0277957	0.0298125	23.5251	0	0.0231766		32.0556	0	0.0541289	0.0406933
		Water use: human healthE,S	0	0.0141951	18.0918	0	0.469555		11.3008	0	0.0253447	0.0238195
	Environmental risks		0.759714	1.59232	26.8671	0.567622	0.495651		25.7949	0.161928	1.32283	1.13144
	Labour conditions		35.6198	27.136	25.2435	37.5357	31.2014	36.9802	22.2787	29.4442	33.0884	31.4825
		Children in employmentS	19.7816	18.7433	14.2276	19.4038	18.1765	20.0005	19.3754	17.0369	19.2687	18.861
		Frequency of forced labourS	28.6774	30.2	20.7814	22.9468	26.6885	20.5447	23.867	19.8411	24.6106	23.3193
		Rate of fatal accidents at workplaceS	7.40904	26.2387	8.04916	14.6251	5.49384	19.8278	13.9899	4.23272	5.6875	15.9
		Rate of non-fatal accidents at workplaceS	12.2127	25.6635	9.0276	21.6891	5.4405	18.6096	6.9765	4.10574	5.6875	15.9
		Right of collective bargainingS	28.0399	8.4778	16.4552	28.8299	31.649	39.5272	1.8346	25.2909	27.5	27.2
		Right to strikeS	68.2112	12.1061	45.1921	71.4655	43.8	39.5272	1.8346	61.058	68.7875	39.5
		Sector average wageP,S	42.6928	31.0838	36.7628	36.44	65.1626	78.6234	32.3384	27.5446	25.6094	51.8
		Trafficking in personsS	77.934	64.5749	51.4519	84.8851	53.2	59.1808	78.0133	76.444	87.5562	59.38
	National conditions		44.8952	54.2817	35.6118	42.3543	42.3574	34.9696	63.8682	32.8357	46.9954	49.2494
		Drinking water coverageS	56.3275	56.2254	46.6396	41.2058	57.9631	20.9481	77.096	39.2272	58.6315	51.472
		Emigration rateS	10.398	21.2	7.2061	17.0291	2.70932	0.06418	2.34636	4.78296	10.125	14.48
		Illiteracy rateS	71.6196	49.7209	45.8012	59.0683	46.9839	57.7823	53.7441	50.1055	63.9443	61.4164
		International migrant stockS	41.4242	54.8	40.012	58.7283	32.1775	27.6	57.4758	24.878	37.1512	65.34
		Life expectancy at birthS	44.5011	61.5705	28.0121	22.882	44.1535	38.0447	85.591	21.2168	47.6645	43.2776
		Public sector corruptionP,A,S	84.6614	90.3358	64.8795	90.7781	84.5476	96.3481	94.4647	84.1158	93.5937	72.92
		Unemployment rate in the countryP,A,S	5.33424	46.1194	16.7322	6.78872	27.9669	4	76.3597	5.5237	17.8578	35.84
	Social risks		40.2575	40.7089	30.4276	39.945	36.7794	35.9749	43.0735	31.14	40.0419	40.366

## Sheet: ML | supply risks
Level	Material Category	Type	Companionality	Demand growth	Recycling rate	Static reach reserves	Substitutability		Production concentration at company level	Production concentration at country level	Reserves concentration		Political perception	Political stability	Trade restrictions
1	Aluminium	Extraction	0			51.6878	47.25		32.3149	69.8361	61.8568		35.9162	62.5867
1	Aluminium	Processing								82.4107				60.7335
1	Aluminium	Secondary Material			64.6667
1	Chromium	Extraction	2			89.0516	83.125		8.10396	75.0387	79.0122		52.8553	71.1115
1	Chromium	Processing								75.9426				53.0379
1	Chromium	Secondary Material			81
1	Gold	Extraction	14			92.9592	43.125		5.24174	55.745	58.0508		32.4525	47.7521
1	Gold	Processing								75.6715				47.8361
1	Gold	Secondary Material			70
1	Iron	Extraction	0.5			34.1968	57.25		64.4404	70.4618	66.0413		37.4018	51.5424
1	Iron	Processing								85.9762				66.9107
1	Iron	Secondary Material			59.6667
1	Nickel	Extraction	2			83.4524	62.375		48.0394	79.6956	74.1459		50.2174	57.7028
1	Nickel	Processing								77.5608				48.6303
1	Nickel	Secondary Material			65
1	Niobium	Extraction	2			0			94.0634	97.4344	98.0562		37.3221	68.8145
1	Niobium	Processing								95.7602				65.346
1	Niobium	Secondary Material			78
1	Platinum	Extraction	16	36.7015		0	67.25		70.2284	88.3175	92.3047		50.4105	76.1225
1	Platinum	Processing
1	Platinum	Secondary Material			67
1	Steel	Processing								79.3189				62.2679
1	Steel	Secondary Material
1	Titanium	Extraction	0	7.3573		59.9104	67		73.0353	69.5526	66.9406		59.8346	66.8397
1	Titanium	Processing								88.1587				65.1152
1	Titanium	Secondary Material			48
1	Zirconium	Extraction	100			71.3735	67.5		79.1098	69.0781	91.9073		40.7037	51.57
1	Zirconium	Processing								79.4178				59.4763
1	Zirconium	Secondary Material			95
2	Aluminium	Extraction								84.3467			6.52544	73.3602	77.39
2	Aluminium	Processing								48.9872				49.1232	31.99
2	Aluminium	Secondary Material			68
2	Chromium	Extraction								76.8855			37.9924	56.9194	56.93
2	Chromium	Processing								73.4878				47.4929	40.34
2	Chromium	Secondary Material			79
2	Gold	Extraction								73.448			21.4187	34.1611	0
2	Gold	Processing
2	Gold	Secondary Material			95
2	Iron	Extraction								68.9814			24.6274	53.7346	42.1
2	Iron	Processing								57.5678				33.8483	3.67
2	Iron	Secondary Material			69
2	Nickel	Extraction								74.8873			12.5615	34.3697	21.06
2	Nickel	Processing								63.3285				46.9336	46.71
2	Nickel	Secondary Material			84
2	Niobium	Extraction
2	Niobium	Processing								93.7191				63.2322	67
2	Niobium	Secondary Material			100
2	Platinum	Extraction								88.7214			48.2971	73.3886	91
2	Platinum	Processing
2	Platinum	Secondary Material			89
2	Steel	Processing
2	Steel	Secondary Material
2	Titanium	Extraction								58.8081			27.0398	47.8199	46.35
2	Titanium	Processing								75.9703				64.3886	44.33
2	Titanium	Secondary Material			99
2	Zirconium	Extraction								77.3769			45.0989	58.0948	53.27
2	Zirconium	Processing								91.7563				43.2512	15.41
2	Zirconium	Secondary Material			88

## Sheet: ML | environmental risks
Level	Material Category	Type	Acidification: terrestrial	Climate change: freshwater ecosystems	Climate change: terrestrial ecosystems	Ecotoxicity: freshwater	Ecotoxicity: marine	Ecotoxicity: terrestrial	Eutrophication: freshwater	Eutrophication: marine	Land use	Photochemical oxidant formation: terrestrial ecosystems	Water use: aquatic ecosystems	Water use: terrestrial ecosystems		Climate change: human health	Human toxicity: carcinogenic	Human toxicity: non-carcinogenic	Ionising radiation	Ozone depletion	Particulate matter formation	Photochemical oxidant formation: human health	Water use: human health		Ecosystem quality	Human health	Environmental risks
1	Aluminium	Extraction	1.8283e-05	1.4473e-05	1.44775e-05	6.12753e-05	5.45167e-05	9.80507e-09	1.14479e-05	4.07959e-07	1.29424e-08	5.69416e-05	3.9938e-06	1.57738e-05		1.44751e-05	0.00101426	4.48395e-05	3.1686e-06	1.55085e-06	1.07765e-05	4.83846e-05	4.61063e-05		2.09678e-05	0.000147951	7.17615e-05
1	Aluminium	Processing	0.0313583	0.0237032	0.0237095	0.306388	0.250418	1.96682e-06	0.152728	0.00217499	2.54198e-05	0.0320233	0.000431321	0.00170341		0.0237056	7.44275	0.289728	0.0183237	0.000623003	0.0213475	0.0277957	0.00497807		0.0693317	1.40156	0.626973
1	Aluminium	Secondary Material	0.000199256	0.000354807	0.000354866	3.58761	2.64432	2.25495e-07	0.000949745	1.41265e-05	1.45906e-06	0.00034439	8.40888e-06	3.32114e-05		0.000354834	0.0446002	0.0266068	0.000116263	8.05868e-06	0.00014334	0.000291941	9.70758e-05		0.606277	0.00904204	0.372287
1	Chromium	Extraction	0.000119695	3.85462e-05	3.85555e-05	0.00317664	0.00235625	3.49064e-08	0.00021595	3.26573e-06	1.62695e-06	0.000344066	5.31315e-06	2.09846e-05		3.85533e-05	0.0216492	0.00171708	3.11854e-05	1.06318e-05	5.9611e-05	0.000295242	6.13374e-05		0.000526804	0.00298574	0.00151046
1	Chromium	Processing	0.0209161	0.0315246	0.0315334	0.950478	0.793865	1.10773e-05	0.116687	0.00185224	4.80835e-05	0.0349461	0.00123051	0.00485899		0.031528	23.749	0.284503	0.0263951	0.00115385	0.020357	0.0298125	0.0141951		0.171652	8.96063	4.78214
1	Chromium	Secondary Material
1	Gold	Extraction	17.809	18.7721	18.7741	69.6464	67.0006	0.00923314	46.0094	5.65857	0.419736	23.2721	3.5639	9.55269		18.7729	60.0815	61.9678	23.8704	3.32928	16.6041	22.0565	16.7218		53.2598	49.232	51.8643
1	Gold	Processing	19.2059	20.1873	20.1893	71.2261	68.5806	0.0113163	47.5807	6.45227	0.501163	24.7559	4.12974	10.6405		20.1882	61.6771	63.5547	25.3594	3.86549	17.971	23.5251	18.0918		54.837	50.8189	53.4443
1	Gold	Secondary Material
1	Iron	Extraction	4.06332e-05	2.38833e-05	2.38896e-05	0.000296356	0.000233538	2.57395e-09	7.74462e-05	1.47929e-06	4.9232e-08	0.000131225	2.14542e-06	8.47348e-06		2.38868e-05	0.00306733	0.000307477	3.32632e-05	3.8056e-06	0.000105307	0.000112561	2.47677e-05		6.99273e-05	0.000459857	0.000225901
1	Iron	Processing	0.0010363	0.00200203	0.00200258	0.0981629	0.0842847	1.08247e-06	0.0067422	0.000121412	3.57683e-06	0.00210132	6.84941e-05	0.000270519		0.00200224	8.92562	0.0253703	0.000728748	3.77223e-05	0.000991415	0.00179645	0.000790697		0.016465	1.76095	0.756803
1	Iron	Secondary Material	4.32412e-05	3.34804e-05	3.34903e-05	0.00310968	0.0022985	3.64712e-08	0.000186288	2.21173e-06	4.10517e-07	9.5999e-05	1.15253e-06	4.55199e-06		3.34845e-05	0.0106913	0.00142945	1.81048e-05	1.50485e-06	2.95157e-05	8.18718e-05	1.33053e-05		0.000484145	0.00153802	0.000905711
1	Nickel	Extraction	0.000885784	0.000927507	0.00092781	0.620009	0.536844	0.00011564	0.0297528	0.000153596	5.24847e-06	0.00201996	3.41699e-06	1.34956e-05		0.000927621	0.435422	0.199329	4.31239e-05	1.85505e-05	0.000435747	0.00171678	3.94474e-05		0.102008	0.0810377	0.0936259
1	Nickel	Processing	0.0341088	0.0219353	0.0219422	1.55823	1.25492	0.000110098	0.106232	0.0131613	9.23893e-05	0.0280932	0.0416927	0.163515		0.0219377	3.80679	1.31156	0.115828	0.00245014	0.0188772	0.0231766	0.469555		0.286088	0.817636	0.502626
1	Nickel	Secondary Material	0.000410514	0.00114797	0.00114815	0.090752	0.068316	4.10036e-07	0.00119979	2.30514e-05	1.52906e-06	0.00077094	1.54085e-05	6.08566e-05		0.00114804	1.86416	0.556418	0.000405523	1.89167e-05	0.000286216	0.000644082	0.000177881		0.0137052	0.325887	0.139927
1	Niobium	Extraction
1	Niobium	Processing
1	Niobium	Secondary Material
1	Platinum	Extraction	0.0411921	0.00871998	0.00872267	2.01338	1.53039	1.26702e-06	0.15323	0.00100987	3.82974e-05	0.0806534	0.000326506	0.00128949		0.00872194	2.13783	2.28174	0.00428753	0.00292087	0.0174638	0.069381	0.0037686		0.346046	0.619876	0.456616
1	Platinum	Processing	28.8737	18.2523	18.2551	61.0543	58.4504	0.00892556	39.6623	4.89877	0.191398	33.3814	1.80907	5.64127		18.2539	64.5831	62.3083	13.3643	8.43745	22.0955	32.0556	11.3008		45.1038	51.6846	48.3509
1	Platinum	Secondary Material	0.20728	0.307548	0.307615	6.78413	5.48595	9.33609e-05	2.15247	0.0367523	0.000831363	0.23505	0.0254013	0.0998944		0.307575	12.414	4.28699	1.96309	0.0145866	0.123925	0.199266	0.288819		1.63661	3.64847	2.49802
1	Steel	Processing	0.000939267	0.00201	0.00201052	0.0616787	0.0505439	2.77025e-07	0.00783687	0.000115433	3.40793e-06	0.00190342	0.000101127	0.0003994		0.00201019	2.48539	0.020771	0.000394248	2.85693e-05	0.000872497	0.00163301	0.00116738		0.0106529	0.355663	0.150306
1	Steel	Secondary Material	6.38558e-05	6.97664e-05	6.97902e-05	0.000183073	0.000152016	8.161e-09	2.41595e-05	1.12143e-06	2.18008e-08	0.000360958	4.1949e-07	1.6568e-06		6.97759e-05	0.00748738	0.000119796	5.33892e-06	3.33769e-06	5.18525e-05	0.000308107	4.8428e-06		7.72378e-05	0.00100665	0.000449014
1	Titanium	Extraction	0.0399977	0.0471139	0.0471258	1.83295	1.52266	7.97848e-06	0.312063	0.00396361	0.000198101	0.054241	0.00219832	0.00867917		0.0471187	17.6764	0.597516	0.0583331	0.00199386	0.0332649	0.0460105	0.0253447		0.345276	5.31313	2.68197
1	Titanium	Processing	0.043999	0.0510506	0.0510635	1.81403	1.50784	8.07694e-06	0.277558	0.00345756	0.00019691	0.0633816	0.00188109	0.00742713		0.0510557	17.7414	0.608388	0.0440527	0.00190417	0.0322996	0.0541289	0.0216915		0.340661	5.34724	2.69835
1	Titanium	Secondary Material
1	Zirconium	Extraction	0.00990325	0.0104321	0.010435	0.523376	0.430251	1.95003e-06	0.065672	0.000849785	8.8737e-05	0.0140813	0.000630772	0.00249101		0.0104332	9.16831	0.145372	0.0614024	0.000436642	0.00678117	0.0119588	0.00727916		0.0908083	1.85244	0.838848
1	Zirconium	Processing	0.032235	0.0367026	0.0367125	1.36689	1.12996	5.99845e-06	0.212489	0.00286098	0.000242359	0.0477407	0.00206587	0.00815641		0.0367065	15.4302	0.462609	0.168822	0.00156672	0.0242345	0.0406933	0.0238195		0.252077	4.2157	2.05941
1	Zirconium	Secondary Material

## Sheet: ML | social risks
Level	Material Category	Type	Children in employment	Frequency of forced labour	Rate of fatal accidents at workplace	Rate of non-fatal accidents at workplace	Right of collective bargaining	Right to strike	Sector average wage	Trafficking in persons		Drinking water coverage	Emigration rate	Illiteracy rate	International migrant stock	Life expectancy at birth	Public sector corruption	Unemployment rate in the country		Labour conditions	National conditions	Social risks
1	Aluminium	Extraction	19.7816	28.6774	7.40904	12.2127	23.7387	38.3414	42.6928	69.299		56.3275	10.398	71.6196	41.4242	44.5011	84.6614	3.6675		30.2691	44.6571	37.4631
1	Aluminium	Processing	17.8485	20.5599	3.7828	3.09422	28.0399	68.2112	25.017	77.934		39.5027	3.9428	50.9769	33.4625	20.0713	82.731	5.33424		30.5609	33.7174	32.1391
1	Chromium	Extraction	18.7433	27.2963	26.2387	25.6635	8.4778	12.1061	31.0838	64.5749		56.2254	6.99996	49.7209	52.5706	61.5705	90.3358	46.1194		26.7731	51.9347	39.3539
1	Chromium	Processing	8	30.2	11.4	11.4	0	9.2	23.8	49.4		48.8	21.2	34.4	54.8	33	72.8	8.6		17.925	39.0857	28.5054
1	Gold	Extraction	14.2276	20.7814	8.04916	9.0276	16.4552	23.3783	36.7628	51.4519		46.6396	7.2061	37.9135	40.012	28.0121	64.8795	16.7322		22.5167	34.485	28.5009
1	Gold	Processing	11.3995	18.0006	1.5995	1.5995	15.995	45.1921	21.1996	50.1937		39.4031		45.8012	17.7975	23.0021	61.7962	3.199		20.6474	31.8332	26.2403
1	Iron	Extraction	19.4038	22.9468	14.6251	21.6891	28.8299	39.818	36.44	57.884		37.5386	17.0291	59.0683	58.7283	22.882	72.1573	6.78872		30.2046	39.1703	34.6875
1	Iron	Processing	18.5953	20.8701	3.29764	3.20604	28.5801	71.4655	26.305	84.8851		41.2058	4.73272	54.244	23.6181	22.2136	90.7781	3.66402		32.1506	34.3509	33.2507
1	Nickel	Extraction	18.1765	26.6885	5.49384	5.4405	31.649	33.521	65.1626	50.3887		57.9631	2.70932	46.9839	32.1775	44.1535	84.5476	27.9669		29.5651	42.3574	35.9612
1	Nickel	Processing	14.8	22.2	2	1	27.6	43.8	39	53.2		42.4	2	41.4	18.8	27.6	69	16.8		25.45	31.1429	28.2964
1	Niobium	Extraction	20.0005	20.5447	19.8278	18.6096	39.5272	39.5272	78.6234	59.1808		20.9481	0.06418	57.7823	25.0398	38.0447	96.3481	2.71744		36.9802	34.4206	35.7004
1	Niobium	Processing	19.6	19.6	19.6	17.6	39.2	39.2	76.4	56.8		19.6		54.8	27.6	35.2	92	4		36	38.8667	37.4333
1	Platinum	Extraction	19.3754	23.867	13.9899	6.9765	1.8346	1.8346	32.3384	78.0133		77.096	2.34636	53.7441	57.4758	85.591	94.4647	76.3597		22.2787	63.8682	43.0735
1	Platinum	Processing
1	Steel	Processing	17.0369	19.8411	4.23272	4.10574	25.2909	61.058	27.5446	76.444		39.2272	4.78296	50.1055	24.878	21.2168	84.1158	5.5237		29.4442	32.8357	31.14
1	Titanium	Extraction	18.9648	24.6106	3.46758	3.99778	18.2395	41.3868	25.6094	71.762		58.6315	5.31274	63.9443	37.1512	47.6645	86.0651	17.8578		26.0048	45.2325	35.6186
1	Titanium	Processing	19.2687	22.2875	5.6875	5.6875	27.5	68.7875	22.6625	87.5562		39.8437	10.125	52.6562	28.8937	19.4312	93.5937	2.5		32.4297	35.2919	33.8608
1	Zirconium	Extraction	18.861	23.3193	8.33332	15.2778	22.0833	26.2499	29.9581	56.5692		51.472	13.8889	61.4164	58.8332	43.2776	70.6941	25.486		25.0815	46.4383	35.7599
1	Zirconium	Processing	10.5	22.36	15.9	15.9	27.2	39.5	51.8	59.38		37.58	14.48	28.2	65.34	18.32	72.92	35.84		30.3175	38.9543	34.6359
2	Aluminium	Extraction	19.4	35.8	5.6	8.2	5.6	6.2	58.8	72.2		76.6	8.6	82.2	26.2	76.6	96.6	9.2		26.475	53.7143	40.0946
2	Aluminium	Processing	18.2	26.8	14.6	17.8	1.2	2.4	35	56.2		49	38.8	32.6	58.6	24.2	73.4	33.8		21.525	44.3429	32.9339
2	Chromium	Extraction	14.2	18.8	19	19	7.6	8.4	23	52.2		46.2		39.2	37.2	53.4	71	48		20.275	49.1667	34.7208
2	Chromium	Processing	17.2	20.4	11.6	11.6	0.8	1.2	22.4	52.6		43	21.2	32.8	55.2	37	55.2	57.4		17.225	43.1143	30.1696
2	Gold	Extraction	19.4	26.6	36.6	46.8	0	0.8	20.8	46		20.8	43.6	20.4	52.4	6.6	58.6	49		24.625	35.9143	30.2696
2	Gold	Processing
2	Iron	Extraction	19	24	21.4	19.4	18.8	19.2	50	53		30.8	12.6	38.6	54.8	29	73.6	21.2		28.1	37.2286	32.6643
2	Iron	Processing	17.8	19.2	18	26	0.4	3.6	37.2	38.6		27	57.2	20	61.6	4	57.8	43.8		20.1	38.7714	29.4357
2	Nickel	Extraction	19	22.8	32.4	39.2	10.8	11.6	35.2	45.4		25.2	31.8	23.4	70	8.6	48.4	57		27.05	37.7714	32.4107
2	Nickel	Processing	17.6	25.2	16.2	16.4	6.4	12.8	39.8	56.8		48.8	26.8	25.8	59	18.4	60	36		23.9	39.2571	31.5786
2	Niobium	Extraction
2	Niobium	Processing	20	20	20	16.8	39.2	39.2	75.6	56.4		20	1.2	52.8	34	32.8	89.6	7.2		35.9	33.9429	34.9214
2	Platinum	Extraction	18.2	22.2	10.4	5.6	0	0	27.8	75.2		75.2	2.4	51.4	53	83.8	91	75.8		19.925	61.8	40.8625
2	Platinum	Processing
2	Steel	Processing
2	Titanium	Extraction	19	24.2	12.6	11	8.8	19.2	32	50.6		48	23.4	41.8	65.6	35.2	65.6	33.4		22.175	44.7143	33.4446
2	Titanium	Processing	11.4	33.6	17	16.8	4.4	12.2	34.4	71.8		56.2	28.2	24.6	68.2	31.2	88.8	16.4		25.2	44.8	35
2	Zirconium	Extraction	19.8	22.8	6.8	13.2	13.6	13.6	27.4	63.2		63.8	13	68.2	62.6	60	79.4	40.8		22.55	55.4	38.975
2	Zirconium	Processing	19	20	20	19.8	2.4	2.4	53.2	40		35.4	56.4	20	80.2	1	59.8	55.4		22.1	44.0286	33.0643

## Sheet: ML | SA | supply risks
Level	Scenario	Material Category	Type	Production concentration at company level	Production concentration at country level	Political stability	Political perception*	Trade restrictions	Recycling rate*
3	1	Aluminium	Processing		38.6362	52.7962		66.9
3	1	Chromium	Processing		70.7064	64.455		58.5
3	1	Gold	Processing
3	1	Iron	Processing		38.6362	54.1232		63.4
3	1	Nickel	Processing		70.7064	47.0379		75
3	1	Niobium	Processing		87.8709	47.6303		67
3	1	Platinum	Processing
3	1	Steel	Processing
3	1	Titanium	Processing		50.4127	53.545		51.38
3	1	Zirconium	Processing		70.7064	64.5735		58.5
3	2	Aluminium	Processing		38.6362	45.1185		20
3	2	Chromium	Processing		38.6362	61.6588		50
3	2	Gold	Processing
3	2	Iron	Processing		38.6362	34.1706		0
3	2	Nickel	Processing		38.6362	49.763		43.4
3	2	Niobium	Processing		80.7717	44.3873		66.9933
3	2	Platinum	Processing
3	2	Steel	Processing
3	2	Titanium	Processing		38.6362	54.6445		36.6
3	2	Zirconium	Processing		70.7064	39.5735		50.25
3	3	Aluminium	Processing		41.972	35.2938		0
3	3	Chromium	Processing		70.7064	43.9573		16.75
3	3	Gold	Processing
3	3	Iron	Processing		38.6362	34.1706		0
3	3	Nickel	Processing		70.7064	35.3081		0
3	3	Niobium	Processing		100.001	37.9147		67
3	3	Platinum	Processing
3	3	Steel	Processing
3	3	Titanium	Processing		100.001	22.2749		0
3	3	Zirconium	Processing		100.001	44.0758		0
*applicable on level 3, but not for scenario analysis conducted for processing stage

## Sheet: ML | SA | social risks
Level	Scenario	Material Category	Type	Children in employment	Frequency of forced labour	Rate of fatal accidents at workplace	Rate of non-fatal accidents at workplace	Right of collective bargaining	Right to strike	Sector average wage	Trafficking in persons		Drinking water coverage	Emigration rate	Illiteracy rate	International migrant stock	Life expectancy at birth	Public sector corruption	Unemployment rate in the country		Subdimension labour conditions	Subdimension national conditions	Dimension social risks
3	1	Aluminium	Processing	20	26	12	12	20	42	40	62		42	12	52	66	24	78	12		29.25	40.8571	35.0536
3	1	Chromium	Processing	15	35	15	15	0	10	35	65		65	25	40	60	35	80	25		23.75	47.1429	35.4464
3	1	Gold	Processing
3	1	Iron	Processing	18	24	10	10	12	26	46	64		38	16	46	34	26	82	14		26.25	36.5714	31.4107
3	1	Nickel	Processing	20	25	10	5	30	45	45	60		40	10	45	40	20	75	20		30	35.7143	32.8571
3	1	Niobium	Processing	20	20	20	10	40	40	70	50		20		40	60	20	70	20		33.75	38.3333	36.0417
3	1	Platinum	Processing
3	1	Steel	Processing
3	1	Titanium	Processing	14	25.2	8.4	8.4	5.6	19.6	25.2	61.6		44.8	14	42	44.8	28	78.4	5.6		21	36.8	28.9
3	1	Zirconium	Processing	15	25	15	15	20	35	50	70		50	20	30	60	20	80	35		30.625	42.1429	36.3839
3	2	Aluminium	Processing	20	28	18	22	4	4	38	54		44	50	30	64	18	78	46		23.5	47.1429	35.3214
3	2	Chromium	Processing	18	32	16	16	4	8	42	62		58	24	42	56	38	80	28		24.75	46.5714	35.6607
3	2	Gold	Processing
3	2	Iron	Processing	20	20	20	30	0	4	46	40		26	60	22	66	4	62	48		22.5	41.1429	31.8214
3	2	Nickel	Processing	20	24	16	18	12	20	40	54		42	30	36	66	22	70	46		25.5	44.5714	35.0357
3	2	Niobium	Processing	19.998	19.998	19.998	13.332	26.664	26.664	53.328	46.662		19.998	19.998	33.33	66.66	13.332	66.66	26.664		28.3305	35.2346	31.7825
3	2	Platinum	Processing
3	2	Steel	Processing
3	2	Titanium	Processing	16	28	16	14	12	26	38	60		40	26	36	62	20	78	16		26.25	39.7143	32.9821
3	2	Zirconium	Processing	15	20	20	15	20	20	50	40		25	30	20	85	5	55	45		25	37.8571	31.4286
3	3	Aluminium	Processing	19.8	24.2	19.8	28.6	0	8.8	37.4	44		30.8	57.2	22	68.2	4.4	70.4	52.8		22.825	43.6857	33.2554
3	3	Chromium	Processing	20	25	20	20	0	0	30	55		40	50	20	70	10	50	45		21.25	40.7143	30.9821
3	3	Gold	Processing
3	3	Iron	Processing	20	20	20	30	0	4	46	40		26	60	22	66	4	62	48		22.5	41.1429	31.8214
3	3	Nickel	Processing	20	25	20	20	0	10	40	45		30	60	20	75	0	55	60		22.5	42.8571	32.6786
3	3	Niobium	Processing	20	20	20	20	0	0	20	40		20	60	20	80	0	60	40		17.5	40	28.75
3	3	Platinum	Processing
3	3	Steel	Processing
3	3	Titanium	Processing	20	20	20	20	0	40	20	40		40	60	20	80	0	40	40		22.5	40	31.25
3	3	Zirconium	Processing	20	20	20	20	0	0	60	40		40	60	20	80	0	60	60		22.5	45.7143	34.1071
